# Supplementary material for: Acceptability and feasibility of an online information linker service for caregivers who have a child with genetic epilepsy: a mixed-method pilot study protocol
Source: HighWire-hosted journal article supplement (doi:10.1136/bmjopen-2022-063249), 2022-10-01
Supplement: bmjopen-2022-063249supp001_data_supplement.pdf [file bmjopen-2022-063249supp001_data_supplement.pdf]

## Supplementary File A. GenE Compass question submission form

Resize font:  
+ | -

You can submit as many questions as you like. You can do this on your own or in partnership with a healthcare professional.

Please **submit one question per form**. This is because we send you a report for each question you submit. Alternatively, you can call our information linker on +612 9348 0718 to help you complete this form.

**What questions can you submit?**

- You can submit questions about your child's diagnosis (such as, 'What are the expected comorbidities?'), natural history information, available support resources, and research that is being conducted on their condition.
- We provide information relevant to your child's genetic condition, but do not provide direct patient care. This is because we do not access your child's medical records.
- Please make sure you provide enough detail in your question to allow us to provide the most relevant information.

**What is your question for the GenE Compass team?**  
\* must provide value

Expand

**Did you submit this question in partnership with a healthcare professional?**  
\* must provide value

Yes  
 No

reset

Submit

Note. All online data collection is captured through a purpose-designed REDCap database.
