# Supplementary material for: Acceptability and feasibility of an online information linker service for caregivers who have a child with genetic epilepsy: a mixed-method pilot study protocol
Source: HighWire-hosted journal article supplement (doi:10.1136/bmjopen-2022-063249), 2022-10-01
Supplement: bmjopen-2022-063249supp003_data_supplement.pdf [file bmjopen-2022-063249supp003_data_supplement.pdf]

## Supplementary C. Neurologist questionnaire

### Section 1: Demographics

1. In which location (i.e. name of hospital or practice) do you primarily see children with known or suspected developmental and epileptic encephalopathies (DEE)? *DEE are the most severe group of epilepsies. They usually begin in infancy or childhood with drug-resistant seizures, epileptiform EEG patterns, developmental slowing or regression, and cognitive impairment. For further information about DEE, please see the PENNSW.org.au website.*
2. Please indicate your primary role (can indicate more than one):
  - General Practitioner
  - Consultant Paediatrician
  - Paediatric Neurologist
  - Other: \_\_\_\_\_
3. How long have you been in the role specified above?
  - <6 months
  - 6 months – 2 years
  - 2 years – 10 years
  - > 10 years
4. How many patients have you cared for with DEE in your primary role?
  - 1-2
  - 3-5
  - 6-10
  - 10+
5. How confident do you feel in caring for children diagnosed with DEE?
  - Not at all (0) – 10 (very)

### Section 1: Your thoughts on GenE Compass

|   | Question                                                                                                             | 4                        | 3                    | 2                        | 1                                |
|---|----------------------------------------------------------------------------------------------------------------------|--------------------------|----------------------|--------------------------|----------------------------------|
| 1 | How would you rate the <b>quality of the reports/information</b> you received with GenE Compass?                     | Excellent                | Good                 | Fair                     | Poor                             |
| 2 | Did you get information that was <b>useful to you/your patient and their family?</b>                                 | Yes, definitely          | Yes, generally       | No, not really           | No, definitely not               |
| 3 | To what extent has GenE Compass <b>met your information needs?</b>                                                   | They helped a great deal | They helped somewhat | They really did not help | They seemed to make things worse |
| 4 | If a parent were in need of information about their child with DEE, would you <b>recommend</b> GenE Compass to them? | No, definitely not       | No, not really       | Yes, generally           | Yes, definitely                  |
| 5 | How satisfied are you with the <b>amount of information</b> you received within the GenE Compass reports?            | No, definitely not       | No, not really       | Yes, generally           | Yes, definitely                  |

|   |                                                                                                                                                                                                                             |                               |                         |                                    |                                    |
|---|-----------------------------------------------------------------------------------------------------------------------------------------------------------------------------------------------------------------------------|-------------------------------|-------------------------|------------------------------------|------------------------------------|
| 6 | Has GenE Compass helped you care for your patients with DEE more <b>effectively</b> ?                                                                                                                                       | Yes, they helped a great deal | Yes, it helped somewhat | No, it really did not help         | No, it seemed to make things worse |
| 7 | In an overall, general sense, how <b>satisfied</b> are you with GenE Compass ( <i>including the process and reports, while acknowledging that this is currently an intervention with parents as the primary audience</i> )? | Very satisfied                | Mostly satisfied        | Indifferent or mildly dissatisfied | Quite dissatisfied                 |
| 8 | If you were to receive <b>another report</b> from GenE Compass, would you use it?                                                                                                                                           | No, definitely not            | No, not really          | Yes, generally                     | Yes, definitely                    |

9. We sent all reports to the neurologist, GP and paediatrician that the caregiver nominated. Please share your thoughts about **this pathway**: \_\_\_\_\_
10. Please share **why** GenE Compass was **beneficial** to you or your patient/s, if at all: \_\_\_\_\_
11. Please share any thoughts or recommendations of how we could **improve** GenE Compass, for either you or your patient/s: \_\_\_\_\_

## Section 2: Information searching and provision

Thinking about the **past 6 months**

|   | Question                                                                                                                                                                                                           | Response                                                                                                                                                                                                                                                                                                     |
|---|--------------------------------------------------------------------------------------------------------------------------------------------------------------------------------------------------------------------|--------------------------------------------------------------------------------------------------------------------------------------------------------------------------------------------------------------------------------------------------------------------------------------------------------------|
| 1 | Please estimate how much time, in total, you spent searching for information related to all of your patients with a confirmed or suspected DEE diagnosis (in regard to their treatment, symptoms or general care): | <ul style="list-style-type: none"> <li>• &lt;30 minutes</li> <li>• 30 minutes - 1 hour</li> <li>• 1 hour – 5 hours</li> <li>• 5-10 hours</li> <li>• 10-20 hours</li> <li>• 20+ hours</li> </ul>                                                                                                              |
| 2 | What, if any, are the barriers to searching for information on your patients with DEE? (select as many as relevant)                                                                                                | <ul style="list-style-type: none"> <li>• Didn't have time</li> <li>• Didn't know what was relevant / most accurate</li> <li>• Didn't know how to or where to look</li> <li>• Was too overwhelmed or stressed</li> <li>• Didn't understand the information</li> <li>• Other: _____</li> <li>• None</li> </ul> |
| 3 | Where did you seek information related to DEE from? (select as many as relevant)                                                                                                                                   | <ul style="list-style-type: none"> <li>• Google</li> <li>• Academic literature (i.e. peer-reviewed journals, GeneReviews)</li> <li>• Medical websites (e.g. UpToDate)</li> </ul>                                                                                                                             |

|  |  |                                                                                                                                                                                                                                                                                                                                                                      |
|--|--|----------------------------------------------------------------------------------------------------------------------------------------------------------------------------------------------------------------------------------------------------------------------------------------------------------------------------------------------------------------------|
|  |  | <ul style="list-style-type: none"> <li>• Please share the preferred websites that you use: _____</li> <li>• A healthcare professional</li> <li>• A non-profit organisation (e.g. GETA)</li> <li>• Support group and/or peer support network</li> <li>• Colleagues</li> <li>• Other families with a child with DEE</li> <li>• Other, please specify: _____</li> </ul> |
|--|--|----------------------------------------------------------------------------------------------------------------------------------------------------------------------------------------------------------------------------------------------------------------------------------------------------------------------------------------------------------------------|

6. How often are you contacted with questions about your patients with a suspected or confirmed diagnosis of a DEE (*by the family, allied health, or other medical professionals*)?
- More regularly than once a fortnightly
  - Once a fortnight to monthly
  - Once every 1-3 months
  - Once every 3-6 months
  - 1-2 times per year
  - Less than once a year

## Section 2: Final questions

|   | Question                                                                                                            | Response |
|---|---------------------------------------------------------------------------------------------------------------------|----------|
| 1 | Would you be willing to participate in a 15-30-minute interview about your experiences with GenE Compass?           | Yes / No |
| 2 | What is the best contact number for you?                                                                            | Open     |
| 3 | What is your email address?                                                                                         |          |
| 4 | Please provide at least three availabilities for your interview. We will then send you a meeting invite. Thank you! | Open     |
